# Supplementary material for: Two-dimensional gold trisoctahedron nanoparticle superlattice sheets: self-assembly, characterization and immunosensing applications
Source: Royal Society of Chemistry journal article supplement (doi:10.1039/c7nr09443d), 2018-01-01
Supplement: c7nr09443d2.pdf [file c7nr09443d2.pdf]

## Supporting Information

# Two-dimensional Gold Tris octahedron Nanoparticle Superlattice Sheets: Self-assembly, Characterization and Immunosensing Applications

*Dashen Dong,<sup>1,2</sup> Lim Wei Yap,<sup>1,2</sup> Detlef-M. Smilgies,<sup>3</sup> Kae Jye Si,<sup>1,2</sup> Qianqian Shi,<sup>1,2</sup> & Wenlong Cheng<sup>1,2\*</sup>*

<sup>1</sup> Department of Chemical Engineering, Faculty of Engineering, Monash University, Clayton 3800, Victoria, Australia

<sup>2</sup> The Melbourne Centre for Nanofabrication, 151 Wellington Road, Clayton 3168, Victoria, Australia

<sup>3</sup> Cornell High Energy Synchrotron Source (CHESS), Ithaca NY 14853, USA

\* Address correspondence to [wenlong.cheng@monash.edu](mailto:wenlong.cheng@monash.edu)

## 1.Characterisation of TOH particles

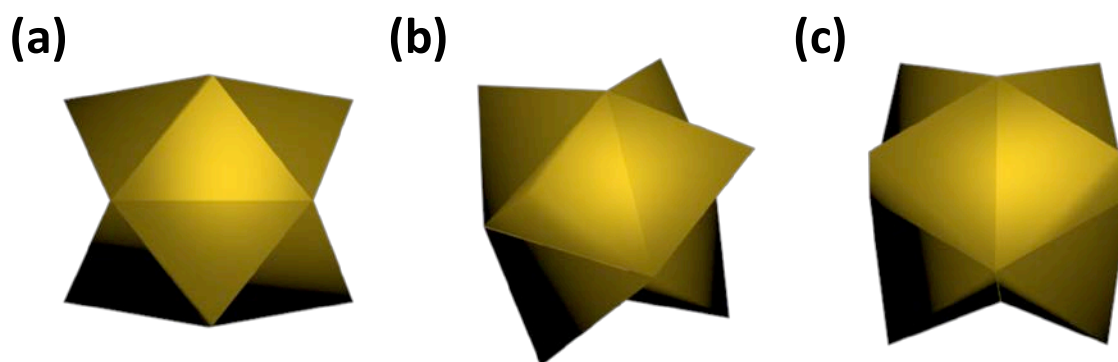

Fig.S1. Schematic drawing of TOH nanoparticles at different viewing directions (a-c)

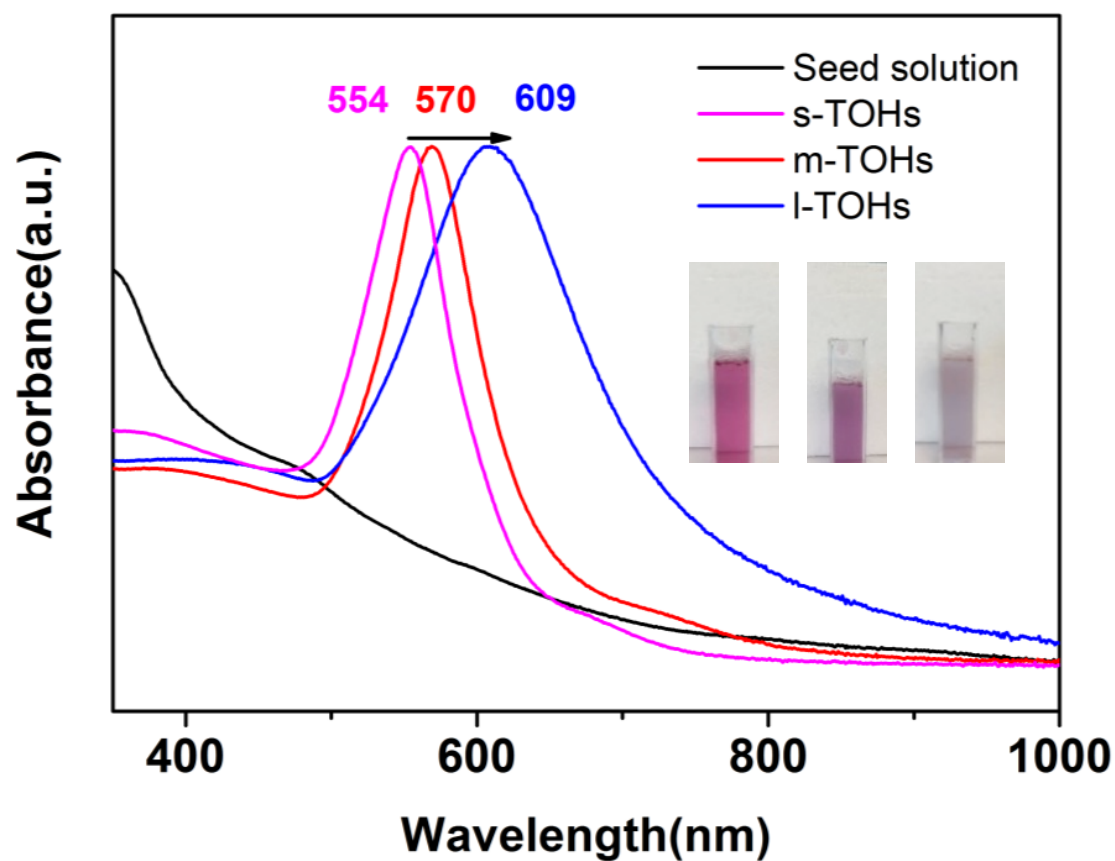

Fig. S2. UV-vis optical spectra of the as-synthesized Au TOH seeds (black line), small (red line), medium (pink) and large (blue line) Au TOH solutions. Insets are photos of small, medium and large Au TOH solutions.

### Small TOH

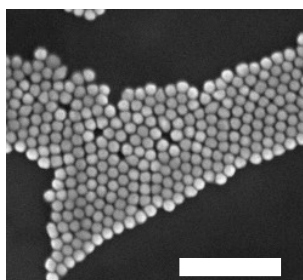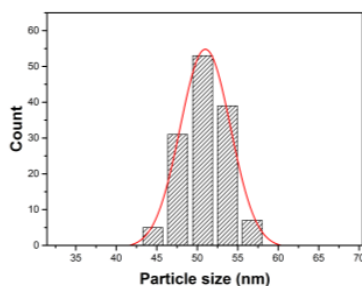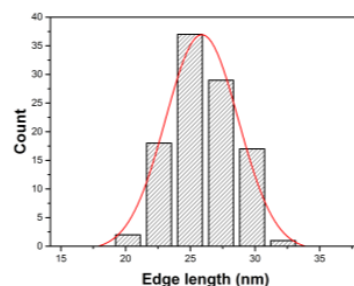

### Medium TOH

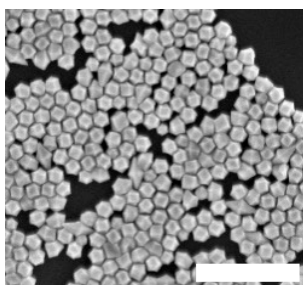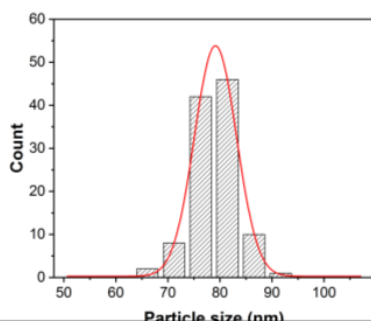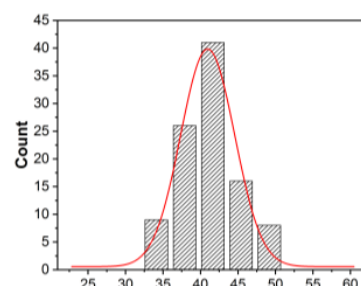

### Large TOH

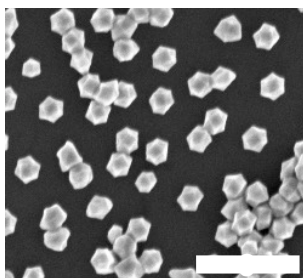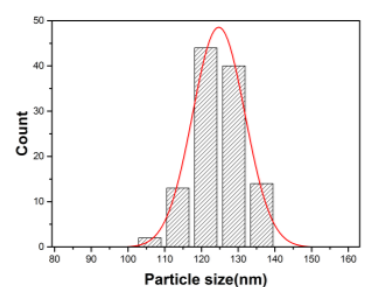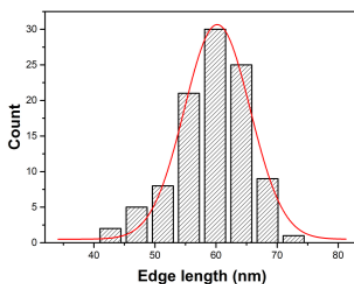

**Fig. S3.** SEM image of TOH particle and corresponding histogram of average particle diameters and apparent edge lengths for three sizes Au TOH. Red lines are the Gaussian fits of the size distributions. Scale bar is 500nm.

The number percentage of TOH with three different sizes was obtained by counting nanoparticles number on SEM images, which is over 96% for small TOH, 95% for medium TOH and 92% for large TOH.

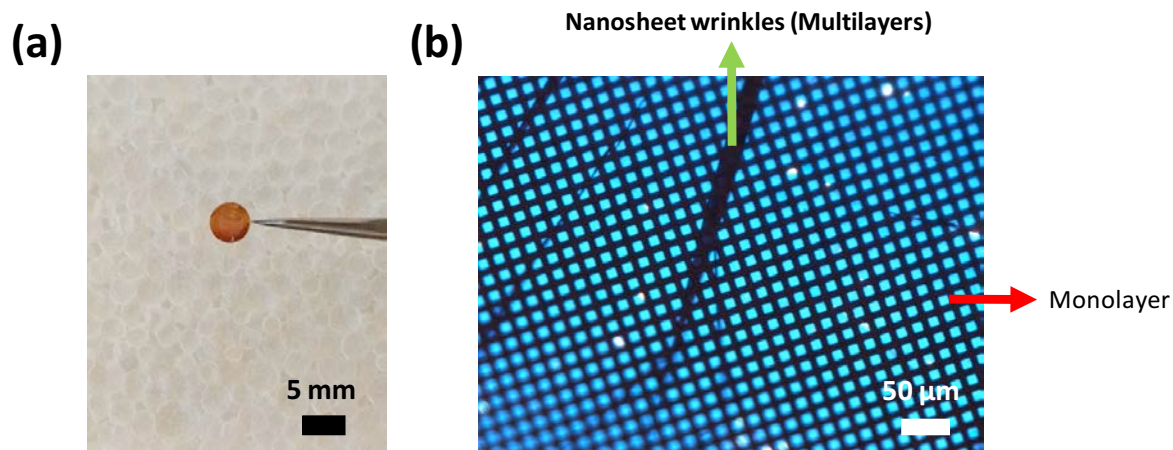

**Fig. S4** (a) A photo of as fabricated free-standing TOH superlattice nanosheet covering on top of a holey copper grid. (b) Optical microscopy image of TOH nanosheet in transmission mode.

## 2. Maintaining structural integrity after plasma treatment

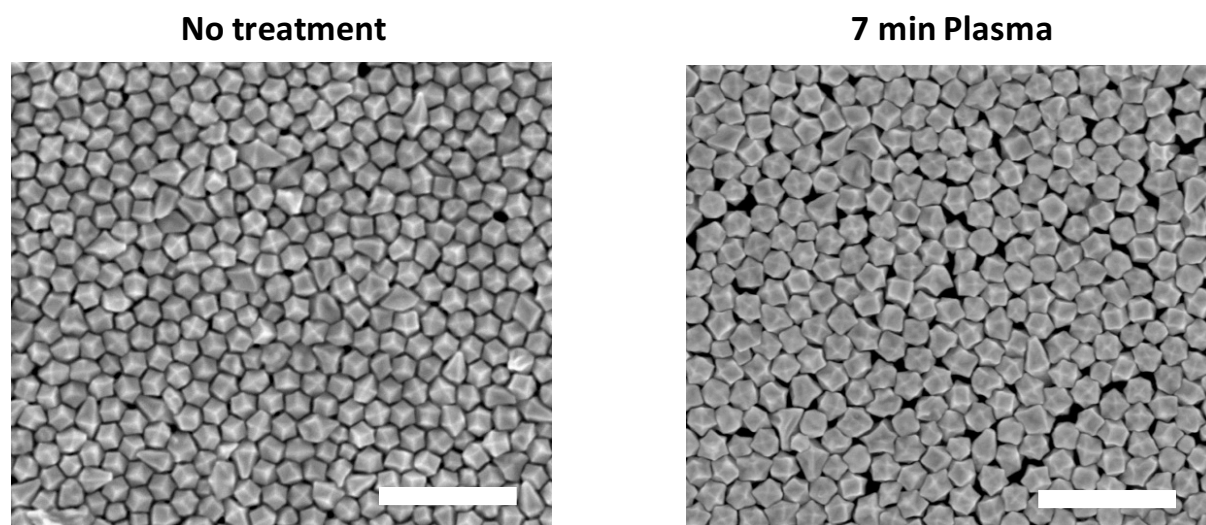

**Fig. S5.** SEM image of 1-TOH (12k PS) superlattices before and after treatments. Scale bar is 500nm.

### 3. Comparison of TOH superlattice SERS with nanosphere superlattices

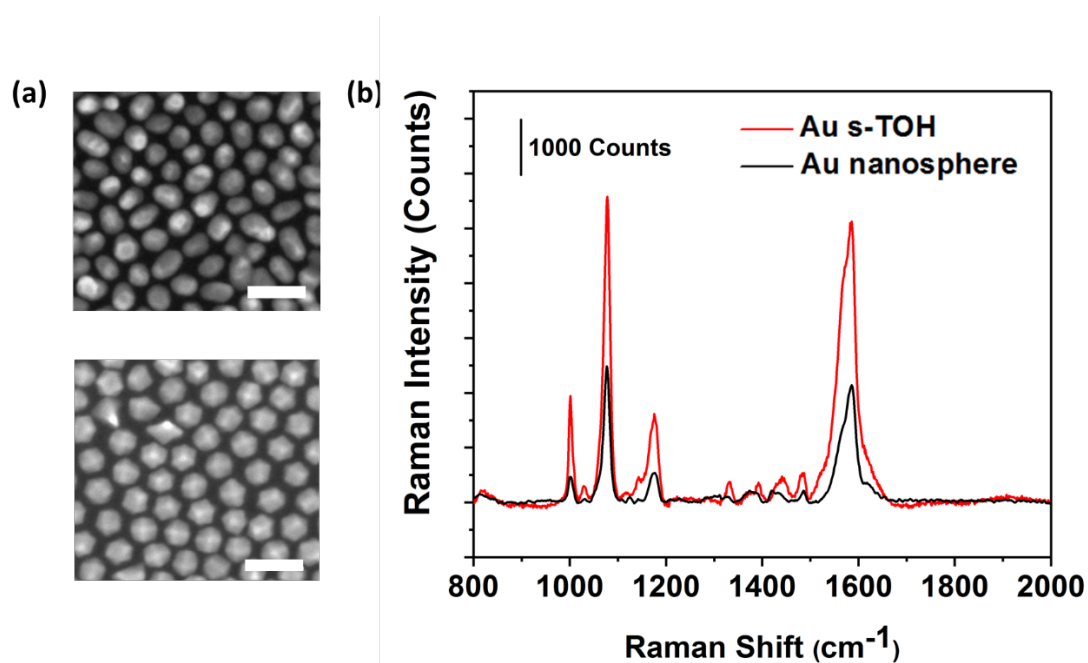

**Fig. S6.** (a) SEM image of gold nanosphere superlattices (top) and s-TOH superlattices (bottom). Scale bar is 100 nm. (b) SERS spectra of 4-ATP from gold nanosphere and s-TOH nanosheet.

#### 4. Comparison of TOH superlattice SERS performance with TOH powder

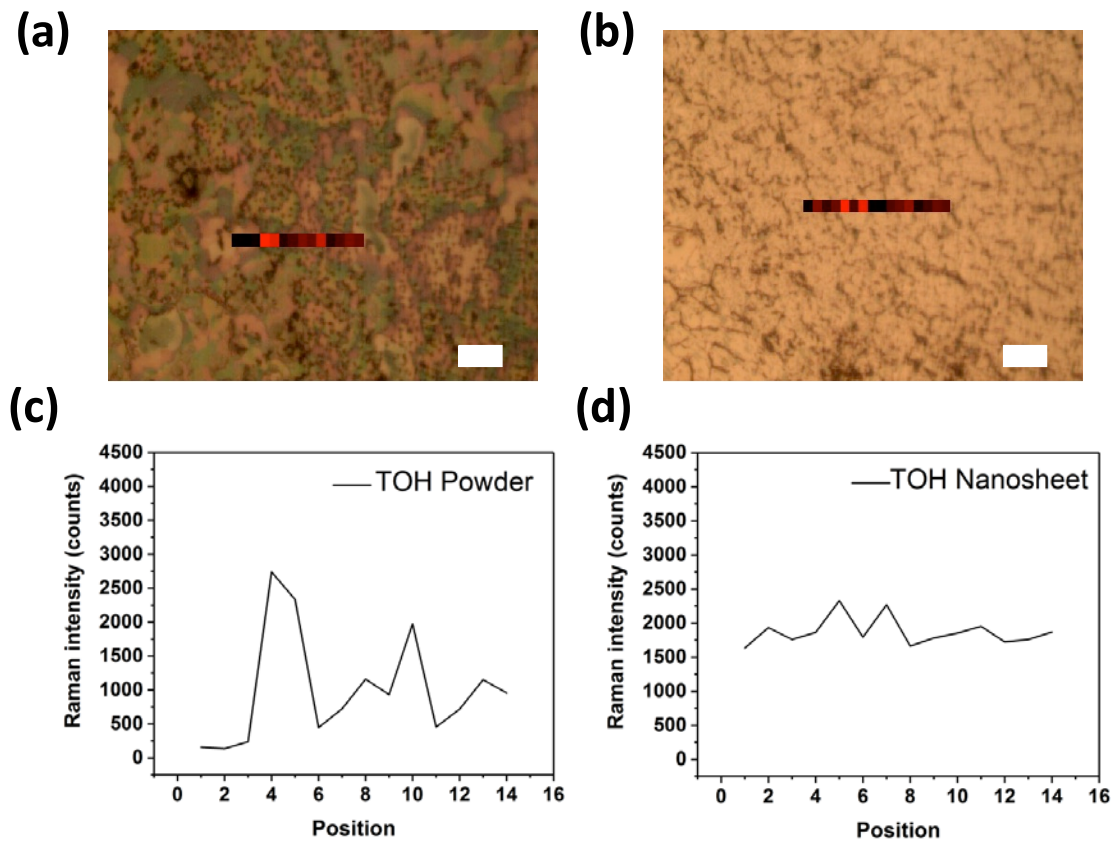

**Fig. S7.** (a) The optical microscopy image of TOH powder. (b) The optical microscopy image of TOH superlattices. The insets red color region are the Raman mapping region. Scale bar is 20  $\mu\text{m}$ . (c) and (d) are the Raman signals at  $1078\text{ cm}^{-1}$  collected from (a) and (b).

#### 5. Calculation of SERS Enhancement Factor (EF)

The EF can be calculated by the classic equation<sup>1</sup>:

$$EF = \frac{I_{SERS}N_{BULK}}{I_{BULK}N_{SERS}},$$

where  $I_{BULK}$  and  $I_{SERS}$  are the peak intensity of bulk-4-ATP and 4-ATP on superlattice nanosheet at  $1078\text{ cm}^{-1}$ ;  $N_{BULK}$  and  $N_{SERS}$  are the number of 4-ATP molecules in a bulk sample and the superlattice nanosheet within the laser spot area.  $N_{SERS}$  can be calculated by  $N_{SERS} =$



$\frac{N_d A_{laser} A_N}{\sigma}$ . Here,  $N_d$  is the number density of particles in unit area,  $A_{laser}$  and  $A_N$  are the areas of focal laser spot and the nanosheet respectively.  $\sigma$  is the footprint size of 4ATP molecule, for which we used  $0.20 \text{ nm}^2$  according to the literature<sup>2</sup>. For analysis, the 4-ATP Raman peak of  $1078 \text{ cm}^{-1}$  was chosen for all EF calculation.

## 6. Verstality of TOH superlattices immunosensing in freestanding system.

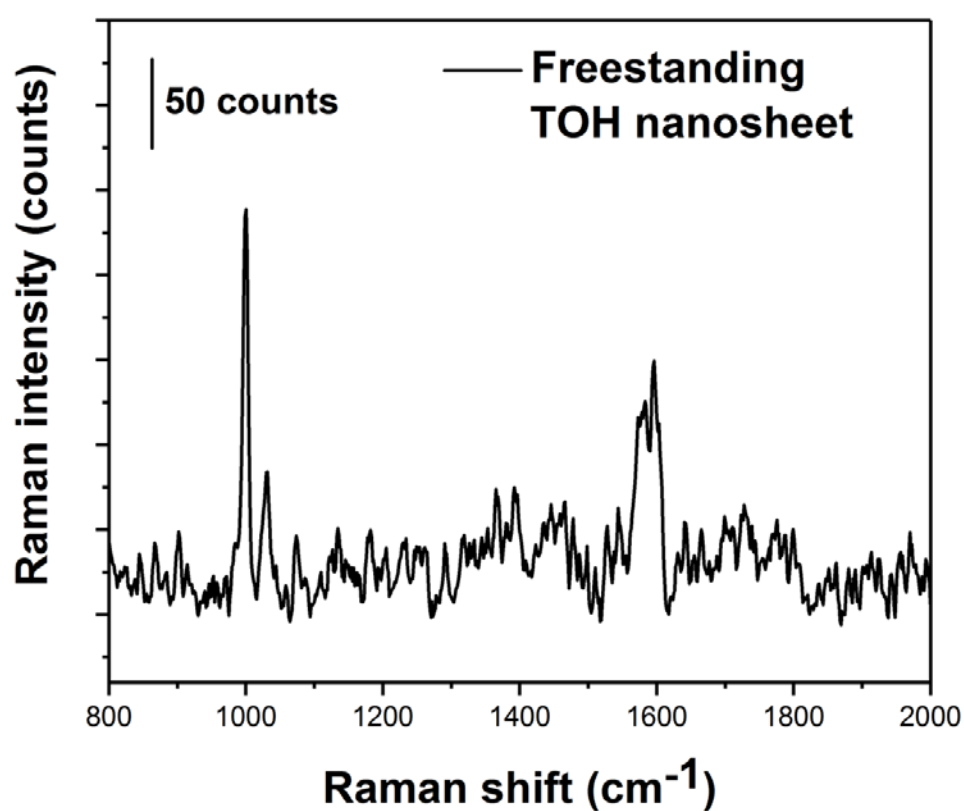

**Fig.S8.** Immunosensing result of freestanding TOH nanosheet by using 1 ng/ml rabbit IgG.

## References

1. Y. Chen, K. J. Si, D. Sikdar, Y. Tang, M. Premaratne and W. Cheng, *Advanced Optical Materials*, 2015, **3**, 919-924.
2. K. Kim and J. K. Yoon, *The Journal of Physical Chemistry B*, 2005, **109**, 20731-20736.
